# Supplementary material for: Testing a self-determination theory model of children’s physical activity motivation: a cross-sectional study
Source: PubMed Central journal article supplement (PMC3852537; doi:10.1186/1479-5868-10-111), 2013-09-26
Supplement: 1479-5868-10-111-S1.pdf [file 1479-5868-10-111-S1.pdf]

**Additional file 1: Table S1:** Confirmatory factor analysis results for measures of self-determined motivation and psychological need satisfaction among children (n=462).

|                                                                                  | Standardized loading | 95% CI            | Standard error*    | P               |
|----------------------------------------------------------------------------------|----------------------|-------------------|--------------------|-----------------|
| <b>Physical Activity Motivation</b>                                              |                      |                   |                    |                 |
| <b>Intrinsic</b>                                                                 |                      |                   |                    |                 |
| Being active is fun                                                              | .673                 | .596, .751        | .039               | .000            |
| I enjoy being active                                                             | .786                 | .726, .847        | .031               | .000            |
| I like being active                                                              | .751                 | .646, .857        | .054               | .000            |
| <b>Identified</b>                                                                |                      |                   |                    |                 |
| It is important to me to be active                                               | .710                 | .651, .769        | .030               | .000            |
| I value the benefits of being active                                             | .622                 | .542, .702        | .041               | .000            |
| In life it is important to be active                                             | .669                 | .587, .751        | .042               | .000            |
| <b>Introjected</b>                                                               |                      |                   |                    |                 |
| When I'm not active I feel bad                                                   | .451                 | .342, .560        | .056               | .000            |
| When I don't do activity I feel bad about myself                                 | .515                 | .389, .641        | .064               | .000            |
| I want to show other people how good I am                                        | .451                 | .331, .570        | .061               | .000            |
| <b>External</b>                                                                  |                      |                   |                    |                 |
| Other people say I should be                                                     | .658                 | .587, .729        | .036               | .000            |
| If I'm not, other people will not be pleased with me                             | .685                 | .600, .769        | .043               | .000            |
| Other people pressure me to be active                                            | .656                 | .549, .762        | .054               | .000            |
| <b>Factor Correlations (p-value)</b>                                             | <b>Intrinsic</b>     | <b>Identified</b> | <b>Introjected</b> | <b>External</b> |
| <b>Intrinsic</b>                                                                 | -                    |                   |                    |                 |
| <b>Identified</b>                                                                | .755 (.000)          | -                 |                    |                 |
| <b>Introjected</b>                                                               | .402 (.000)          | .701 (.000)       | -                  |                 |
| <b>External</b>                                                                  | .031 (.642)          | .233 (.000)       | .880 (.000)        | -               |
| <b>Psychological Need Satisfaction</b>                                           |                      |                   |                    |                 |
| <b>Autonomy</b>                                                                  |                      |                   |                    |                 |
| I can decide which activities / sports I want to do                              | .606                 | .499, .714        | .055               | .000            |
| I have a say in what activities / sports that I want to do                       | .602                 | .505, .698        | .049               | .000            |
| I feel I am active because I want to be                                          | .606                 | .522, .689        | .043               | .000            |
| I feel free when I'm active                                                      | .544                 | .432, .655        | .057               | .000            |
| I have some choice in what activity / sport I want to do                         | .603                 | .511, .694        | .047               | .000            |
| <b>Competence</b>                                                                |                      |                   |                    |                 |
| When it comes to playing active games, I think I am pretty good                  | .740                 | .681, .799        | .030               | .000            |
| I think I do well, compared to other children my age                             | .682                 | .601, .764        | .042               | .000            |
| After working at a new activity for a while, I feel that I can do it pretty well | .619                 | .531, .707        | .045               | .000            |
| I am happy with how good I am at doing active games                              | .682                 | .627, .737        | .028               | .000            |
| When it comes to being active, I think I have good physical skills.              | .748                 | .682, .813        | .033               | .000            |
| <b>Relatedness</b>                                                               |                      |                   |                    |                 |
| I am included by others                                                          | .627                 | .525, .729        | .052               | .000            |
| I feel like I'm part of a team                                                   | .678                 | .601, .755        | .040               | .000            |
| I am supported by others                                                         | .711                 | .676, .745        | .018               | .000            |
| Others want me to be active with them                                            | .632                 | .559, .704        | .037               | .000            |
| I have close bonds with others                                                   | .586                 | .493, .679        | .048               | .000            |
| I fit in well with others                                                        | .672                 | .589, .756        | .043               | .000            |
| <b>Factor Correlations (p-value)</b>                                             | <b>Autonomy</b>      | <b>Competence</b> | <b>Relatedness</b> |                 |
| <b>Autonomy</b>                                                                  | -                    |                   |                    |                 |
| <b>Competence</b>                                                                | .839 (.000)          | -                 |                    |                 |
| <b>Relatedness</b>                                                               | .756 (.000)          | .749 (.000)       | -                  |                 |

\*Robust standard errors are reported as participants were clustered within schools.
