# Supplementary material for: Testing a self-determination theory model of children’s physical activity motivation: a cross-sectional study
Source: PubMed Central journal article supplement (PMC3852537; doi:10.1186/1479-5868-10-111), 2013-09-26
Supplement: 1479-5868-10-111-S2.pdf [file 1479-5868-10-111-S2.pdf]

**Additional file 2: Figure S1.**

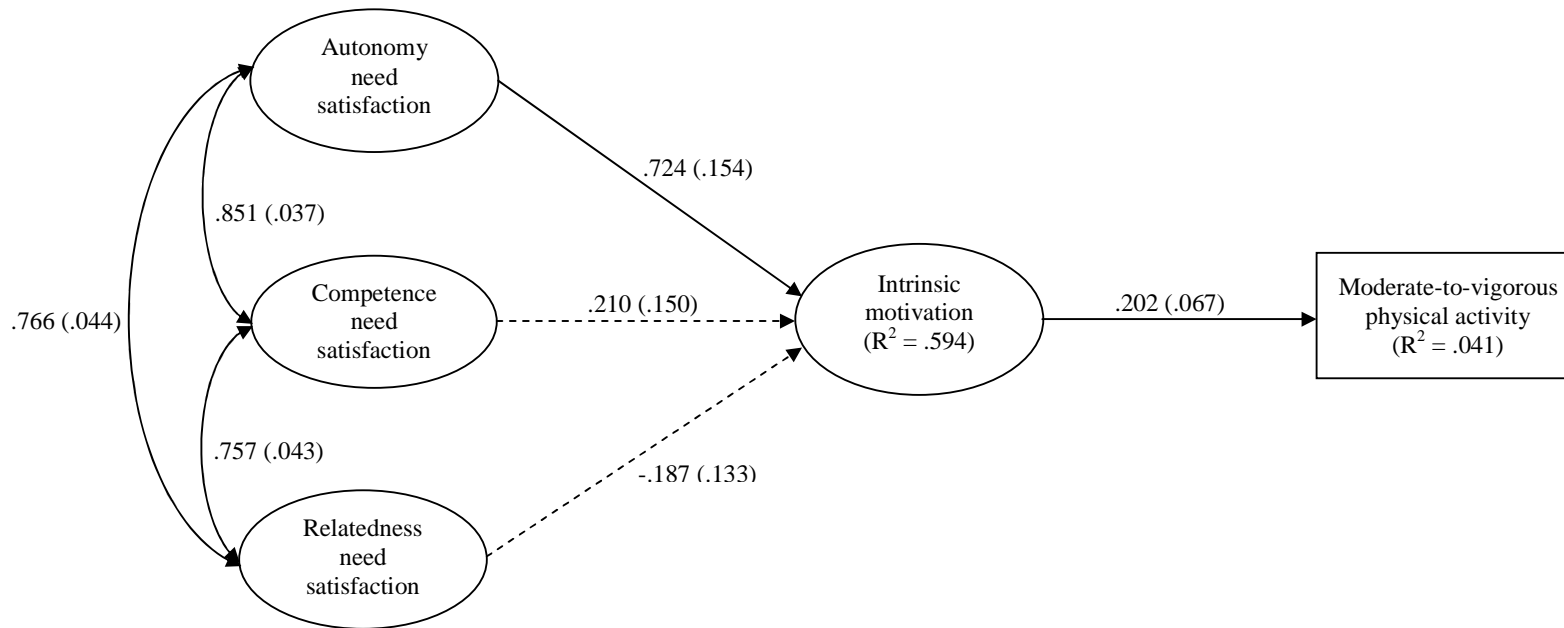

Note: Parameter estimates are standardized. Solid arrows represent significant estimates (all  $p < .003$ ) and dashed arrows represent non-significant estimates ( $p > .05$ ). Values in parentheses are robust standard errors.
